# Supplementary figures and images for: Global Systematic Mapping of Road Dust Research from 1906 to 2020: Research Gaps and Future Direction
Source: MDPI journal article supplement (doi:10.3390/su132011516), 2021-10-18

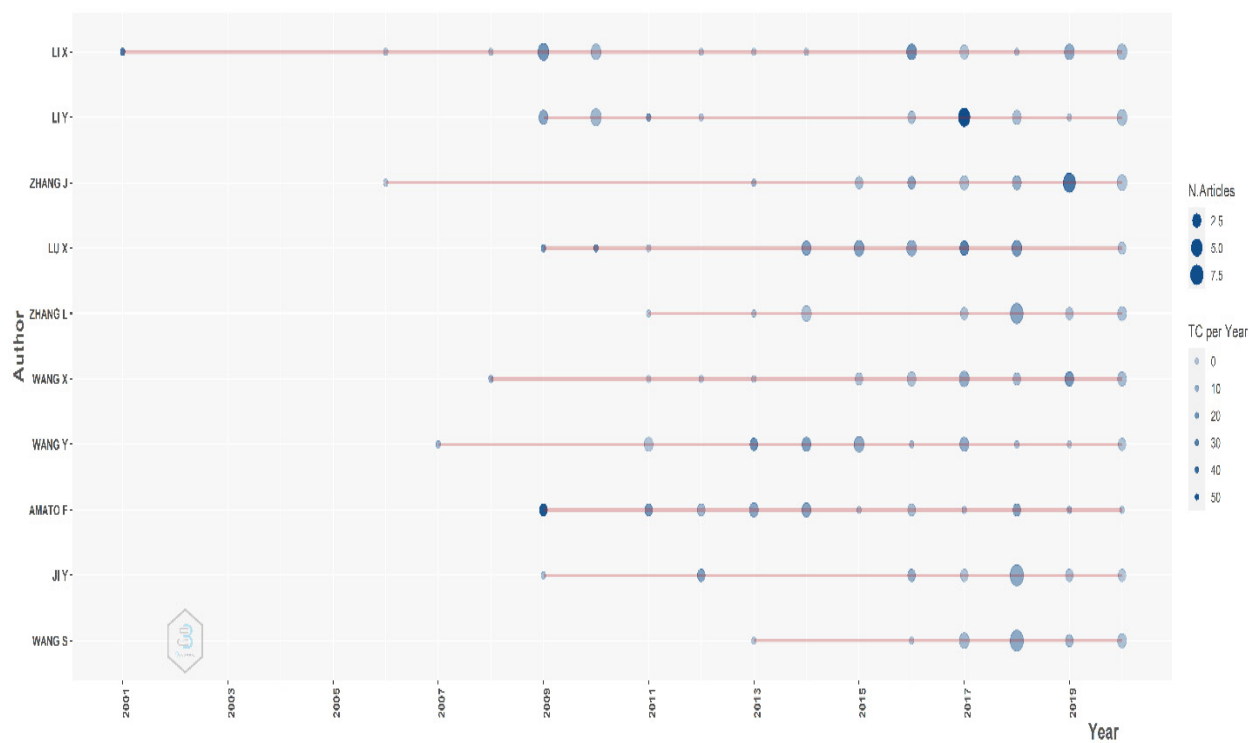

**ESI Figure S1: Top authors' publication output on road dust research over the years**

Supplement: s1 [file s1]
